# Supplementary material for: Tumor microenvironment biomarkers predicting pathological response to neoadjuvant chemoimmunotherapy in locally advanced esophageal squamous cell carcinoma: post-hoc analysis of a single center, phase 2 study
Source: PubMed Central journal article supplement — J Immunother Cancer. 2024 Aug 28;12(8):e008942. doi: 10.1136/jitc-2024-008942 (PMC11367339; doi:10.1136/jitc-2024-008942), 2024-08-28
Supplement: jitc-12-8-s002.pdf [file jitc-12-8-s002.pdf]

**A**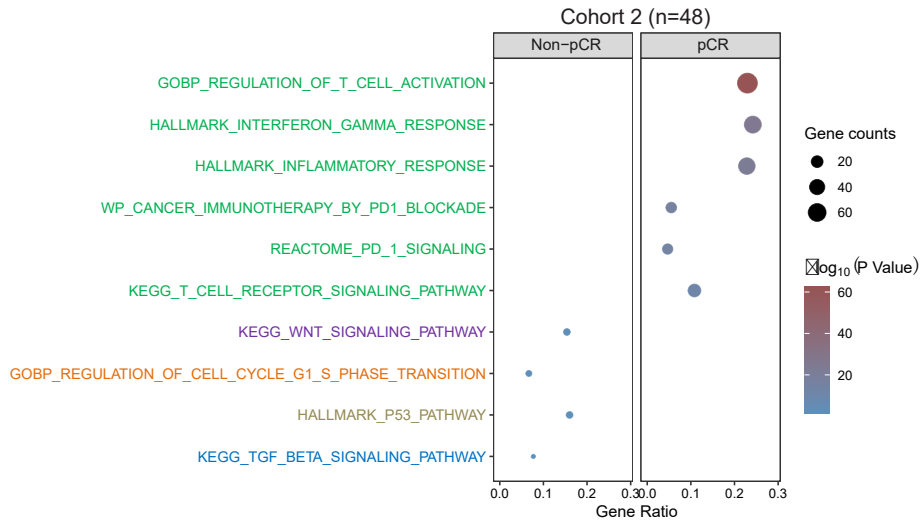**B**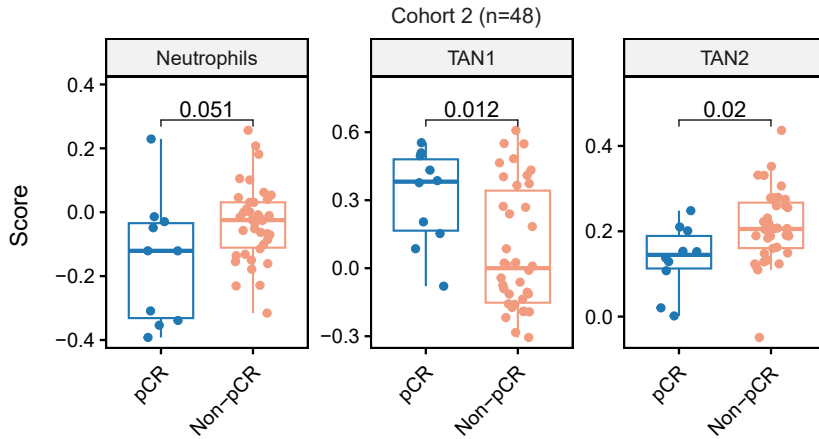

**Figure S1. Identification of expression features in the cohort 2.** (A) Results of pathway enrichment under different therapeutic responses in cohort 2. (B) Boxplots indicating the GSEA score of different neutrophils in patients with different responses in the cohort 2.
