# Supplementary material for: Tumor microenvironment biomarkers predicting pathological response to neoadjuvant chemoimmunotherapy in locally advanced esophageal squamous cell carcinoma: post-hoc analysis of a single center, phase 2 study
Source: PubMed Central journal article supplement — J Immunother Cancer. 2024 Aug 28;12(8):e008942. doi: 10.1136/jitc-2024-008942 (PMC11367339; doi:10.1136/jitc-2024-008942), 2024-08-28
Supplement: jitc-12-8-s003.pdf [file jitc-12-8-s003.pdf]

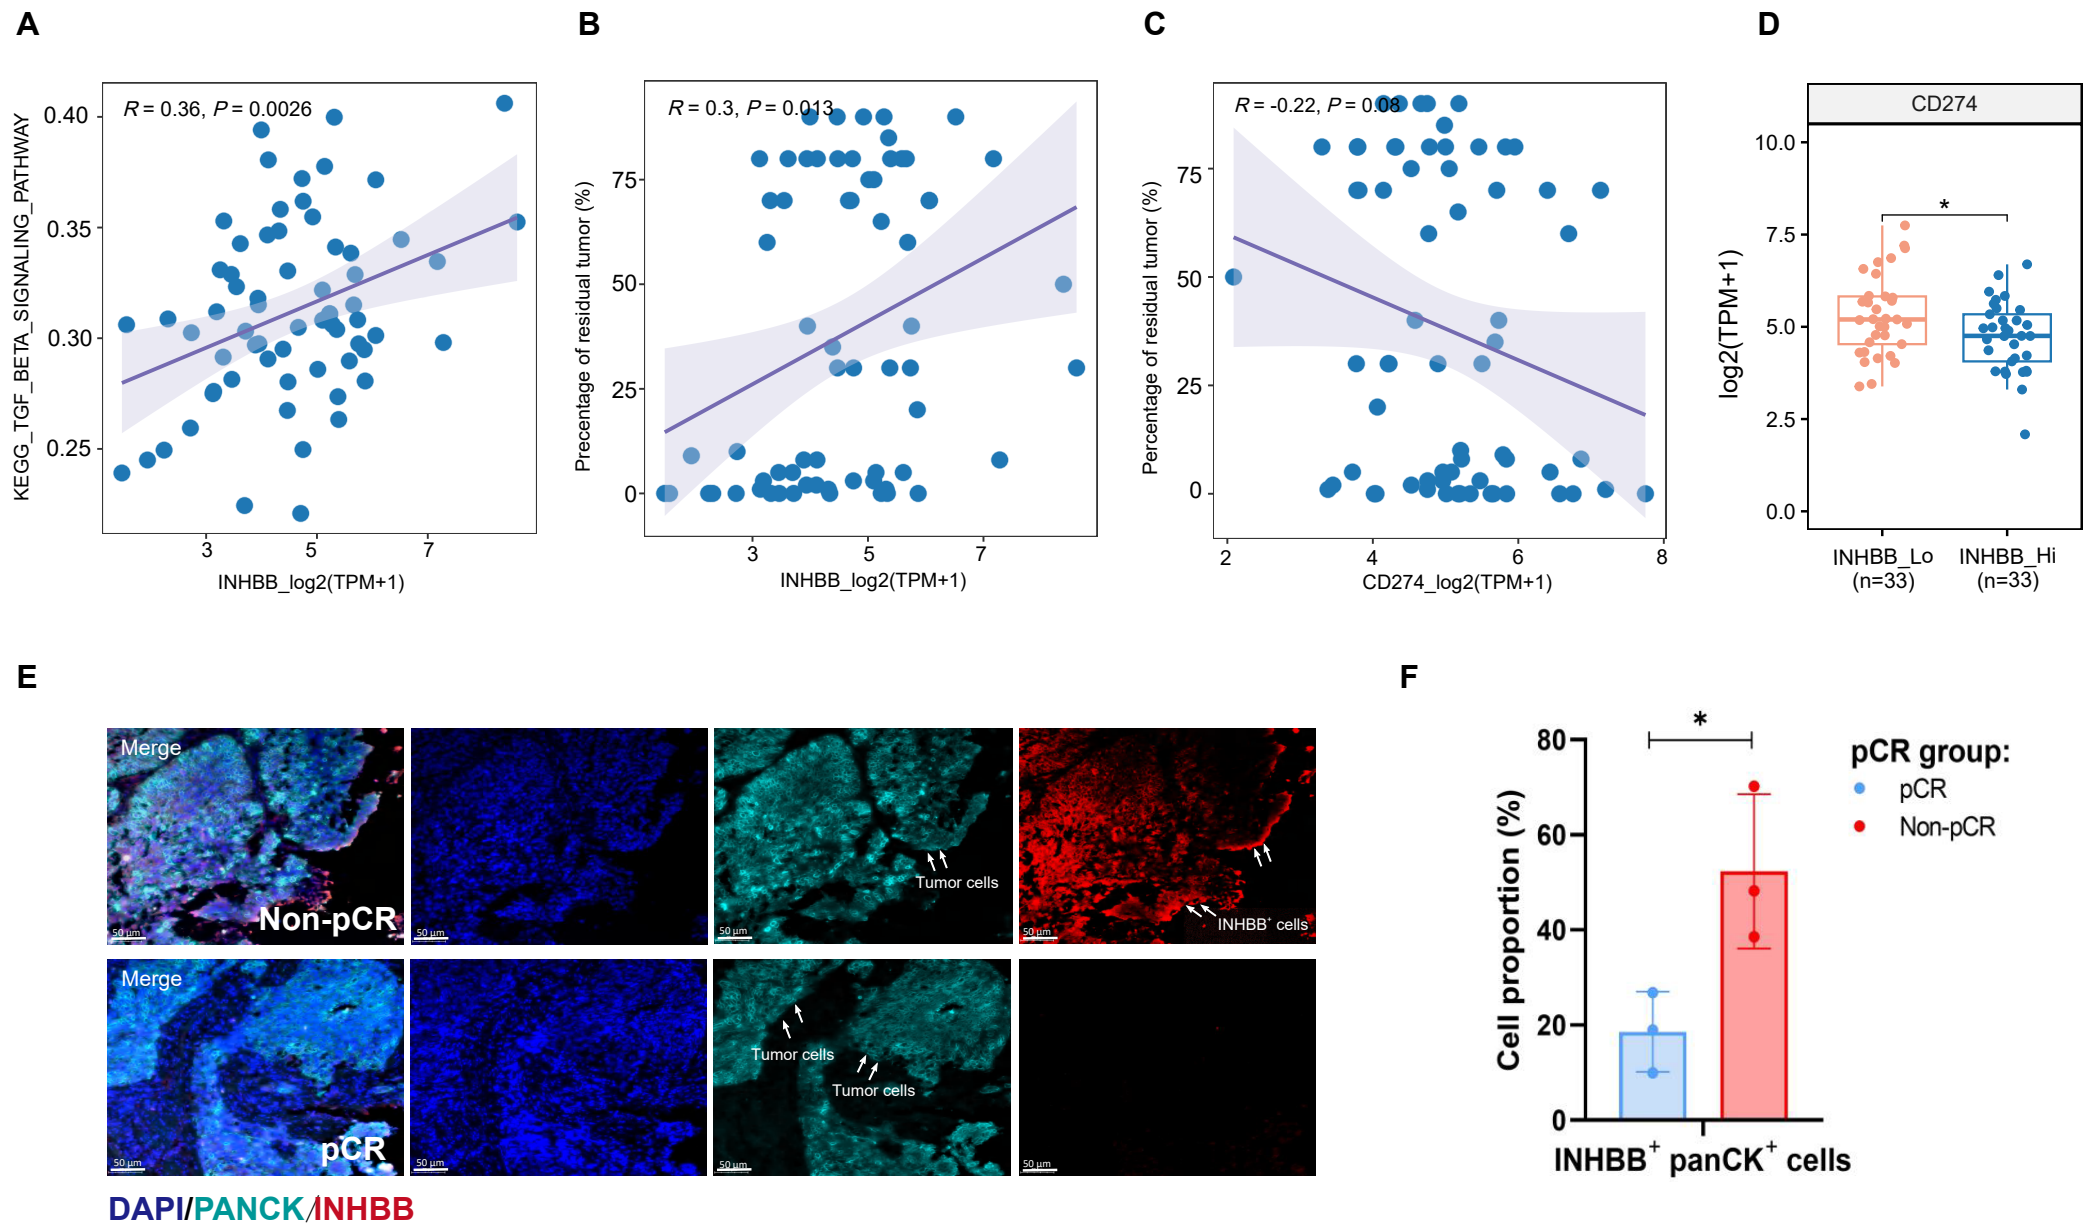

**Figure S2. TGF- $\beta$ -related gene INHBB was highly expressed in non-pCR patients.** (A) Dotplot indicating the correlation between INHBB and KEGG\_TGF\_BETA\_SIGNALING\_PATHWAY in cohort 1. (B) Dotplot indicating the correlation between INHBB gene expression level and percentage of residual tumor in cohort 1. (C) Dotplot indicating the correlation between CD274 gene expression level and percentage of residual tumor in cohort 1. (D) Expression of CD274 between high and low INHBB groups in cohort 1. (E) Representative mIF images of patients in cohort 2. Nuclei (DAPI, blue), PANCK (green), INHBB (red). (F) Proportion of different cells in patients with different therapeutic responses in cohort 2. \*, \*\*, and \*\*\* represent  $P < 0.05$ ,  $P < 0.01$ , and  $P < 0.001$ , respectively.
