# Supplementary material for: Tumor microenvironment biomarkers predicting pathological response to neoadjuvant chemoimmunotherapy in locally advanced esophageal squamous cell carcinoma: post-hoc analysis of a single center, phase 2 study
Source: PubMed Central journal article supplement — J Immunother Cancer. 2024 Aug 28;12(8):e008942. doi: 10.1136/jitc-2024-008942 (PMC11367339; doi:10.1136/jitc-2024-008942), 2024-08-28
Supplement: jitc-12-8-s004.pdf [file jitc-12-8-s004.pdf]

A

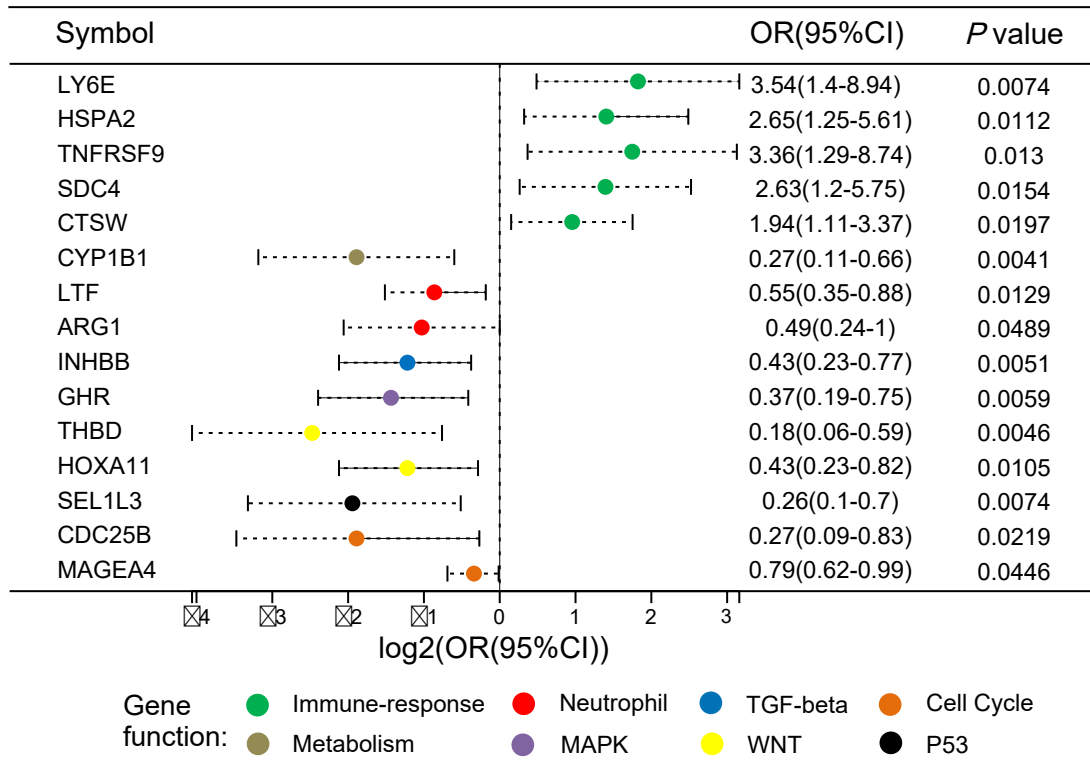

B

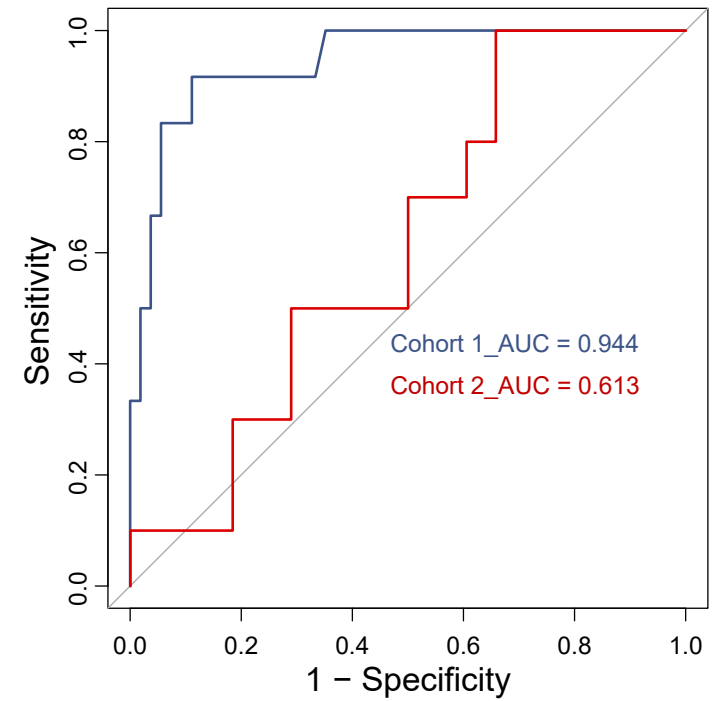

**Figure S3. Performance of 15-gene prediction model.** (A) Forest plot for the association between genes and pCR. (B) ROC curves depicting 15-gene prediction model score performance in cohorts 1 and 2. AUC values are shown for each cohort.
