# Supplementary material for: Tumor microenvironment biomarkers predicting pathological response to neoadjuvant chemoimmunotherapy in locally advanced esophageal squamous cell carcinoma: post-hoc analysis of a single center, phase 2 study
Source: PubMed Central journal article supplement — J Immunother Cancer. 2024 Aug 28;12(8):e008942. doi: 10.1136/jitc-2024-008942 (PMC11367339; doi:10.1136/jitc-2024-008942), 2024-08-28
Supplement: jitc-12-8-s005.pdf [file jitc-12-8-s005.pdf]

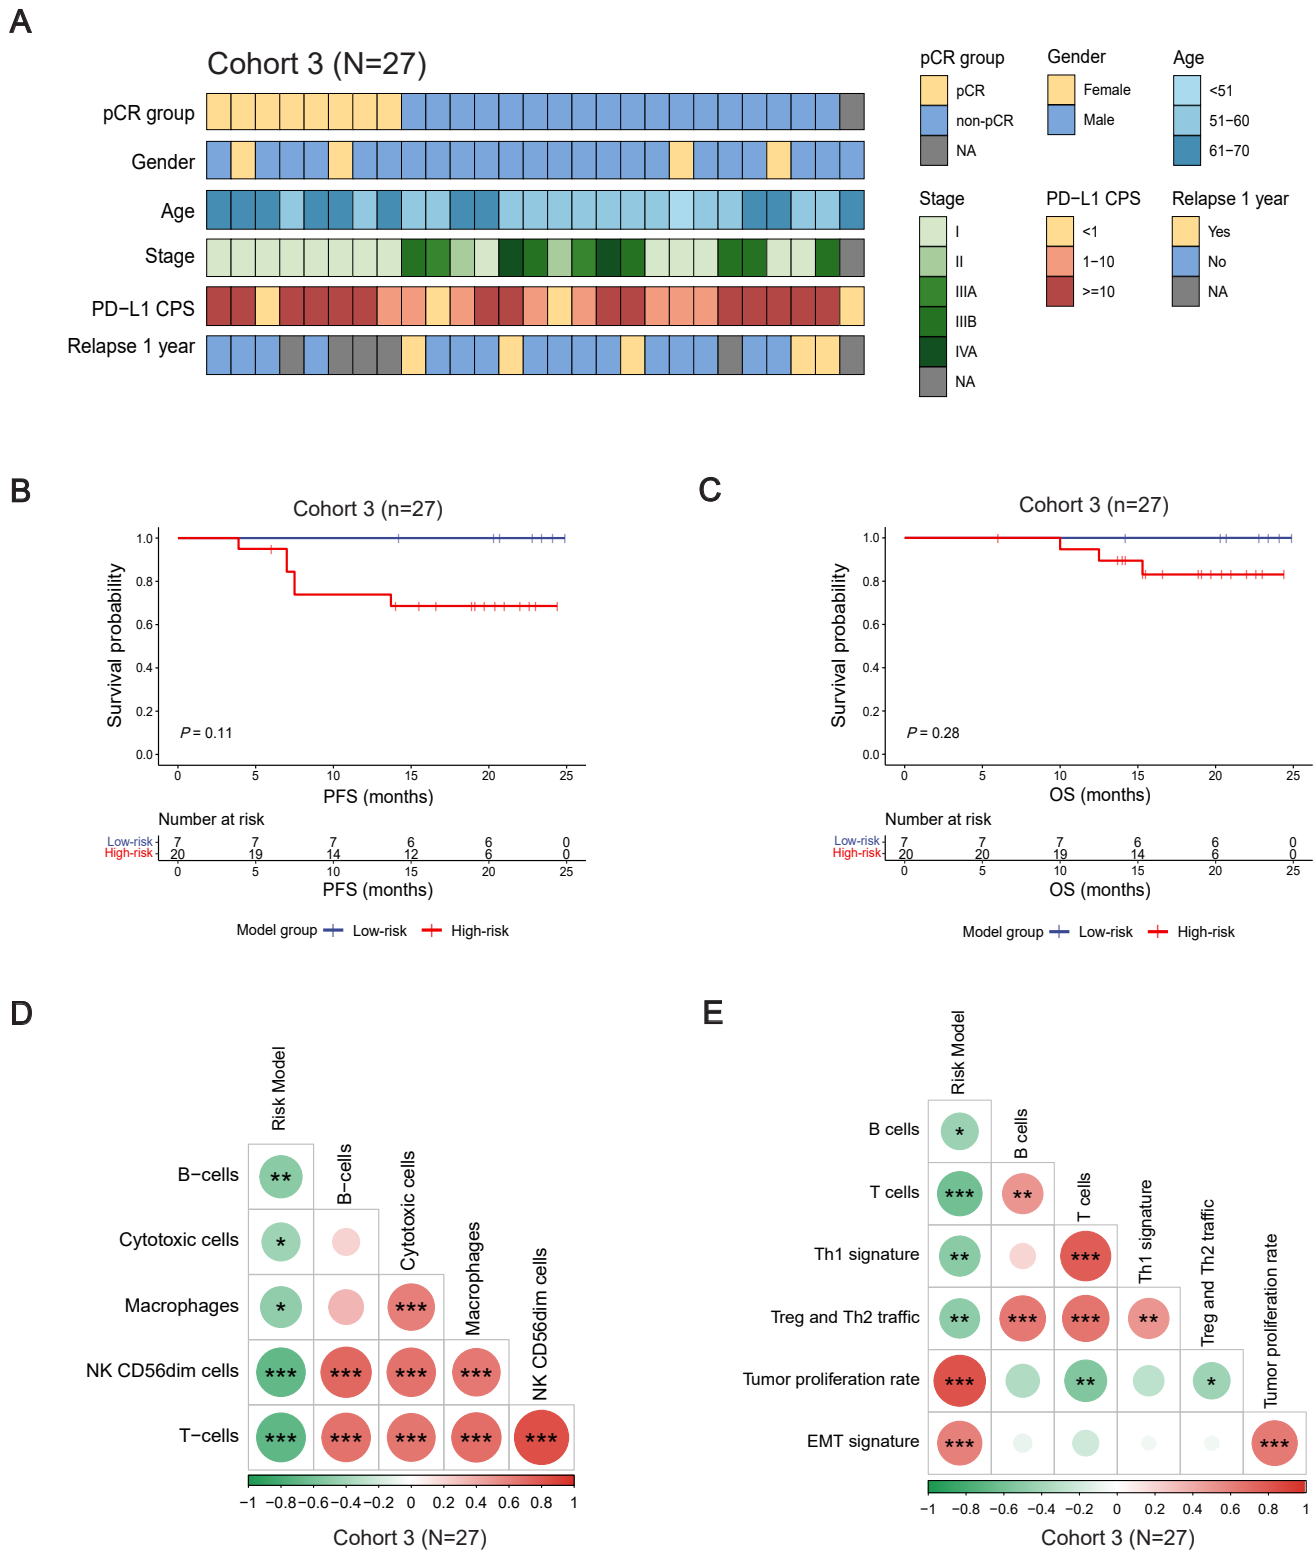

**Figure S4. Survival and TME analysis of the cohort 3.** (A) Heatmap illustrating baseline characteristics of cohort 3 (N=27). Kaplan–Meier analyses of progression-free survival (PFS) (B) and overall survival (OS) (C) stratified according to the risk prediction score in cohort 3. Data were analyzed by log-rank test. (D) Correlation maps and heatmaps analyzing the association between NCIRPs and 28 gene signatures within cohort 3. (E) Correlation maps and heatmaps analyzing the association between NCIRPs and 29 gene signatures within cohort 3. Dot color represents Pearson correlation coefficient, dot size represents the absolute value of the correlation coefficient. \*, \*\*, and \*\*\* represent statistical significance levels of  $P < 0.05$ ,  $P < 0.01$ , and  $P < 0.001$ , respectively.
