# Supplementary material for: Tumor microenvironment biomarkers predicting pathological response to neoadjuvant chemoimmunotherapy in locally advanced esophageal squamous cell carcinoma: post-hoc analysis of a single center, phase 2 study
Source: PubMed Central journal article supplement — J Immunother Cancer. 2024 Aug 28;12(8):e008942. doi: 10.1136/jitc-2024-008942 (PMC11367339; doi:10.1136/jitc-2024-008942), 2024-08-28
Supplement: jitc-12-8-s006.pdf [file jitc-12-8-s006.pdf]

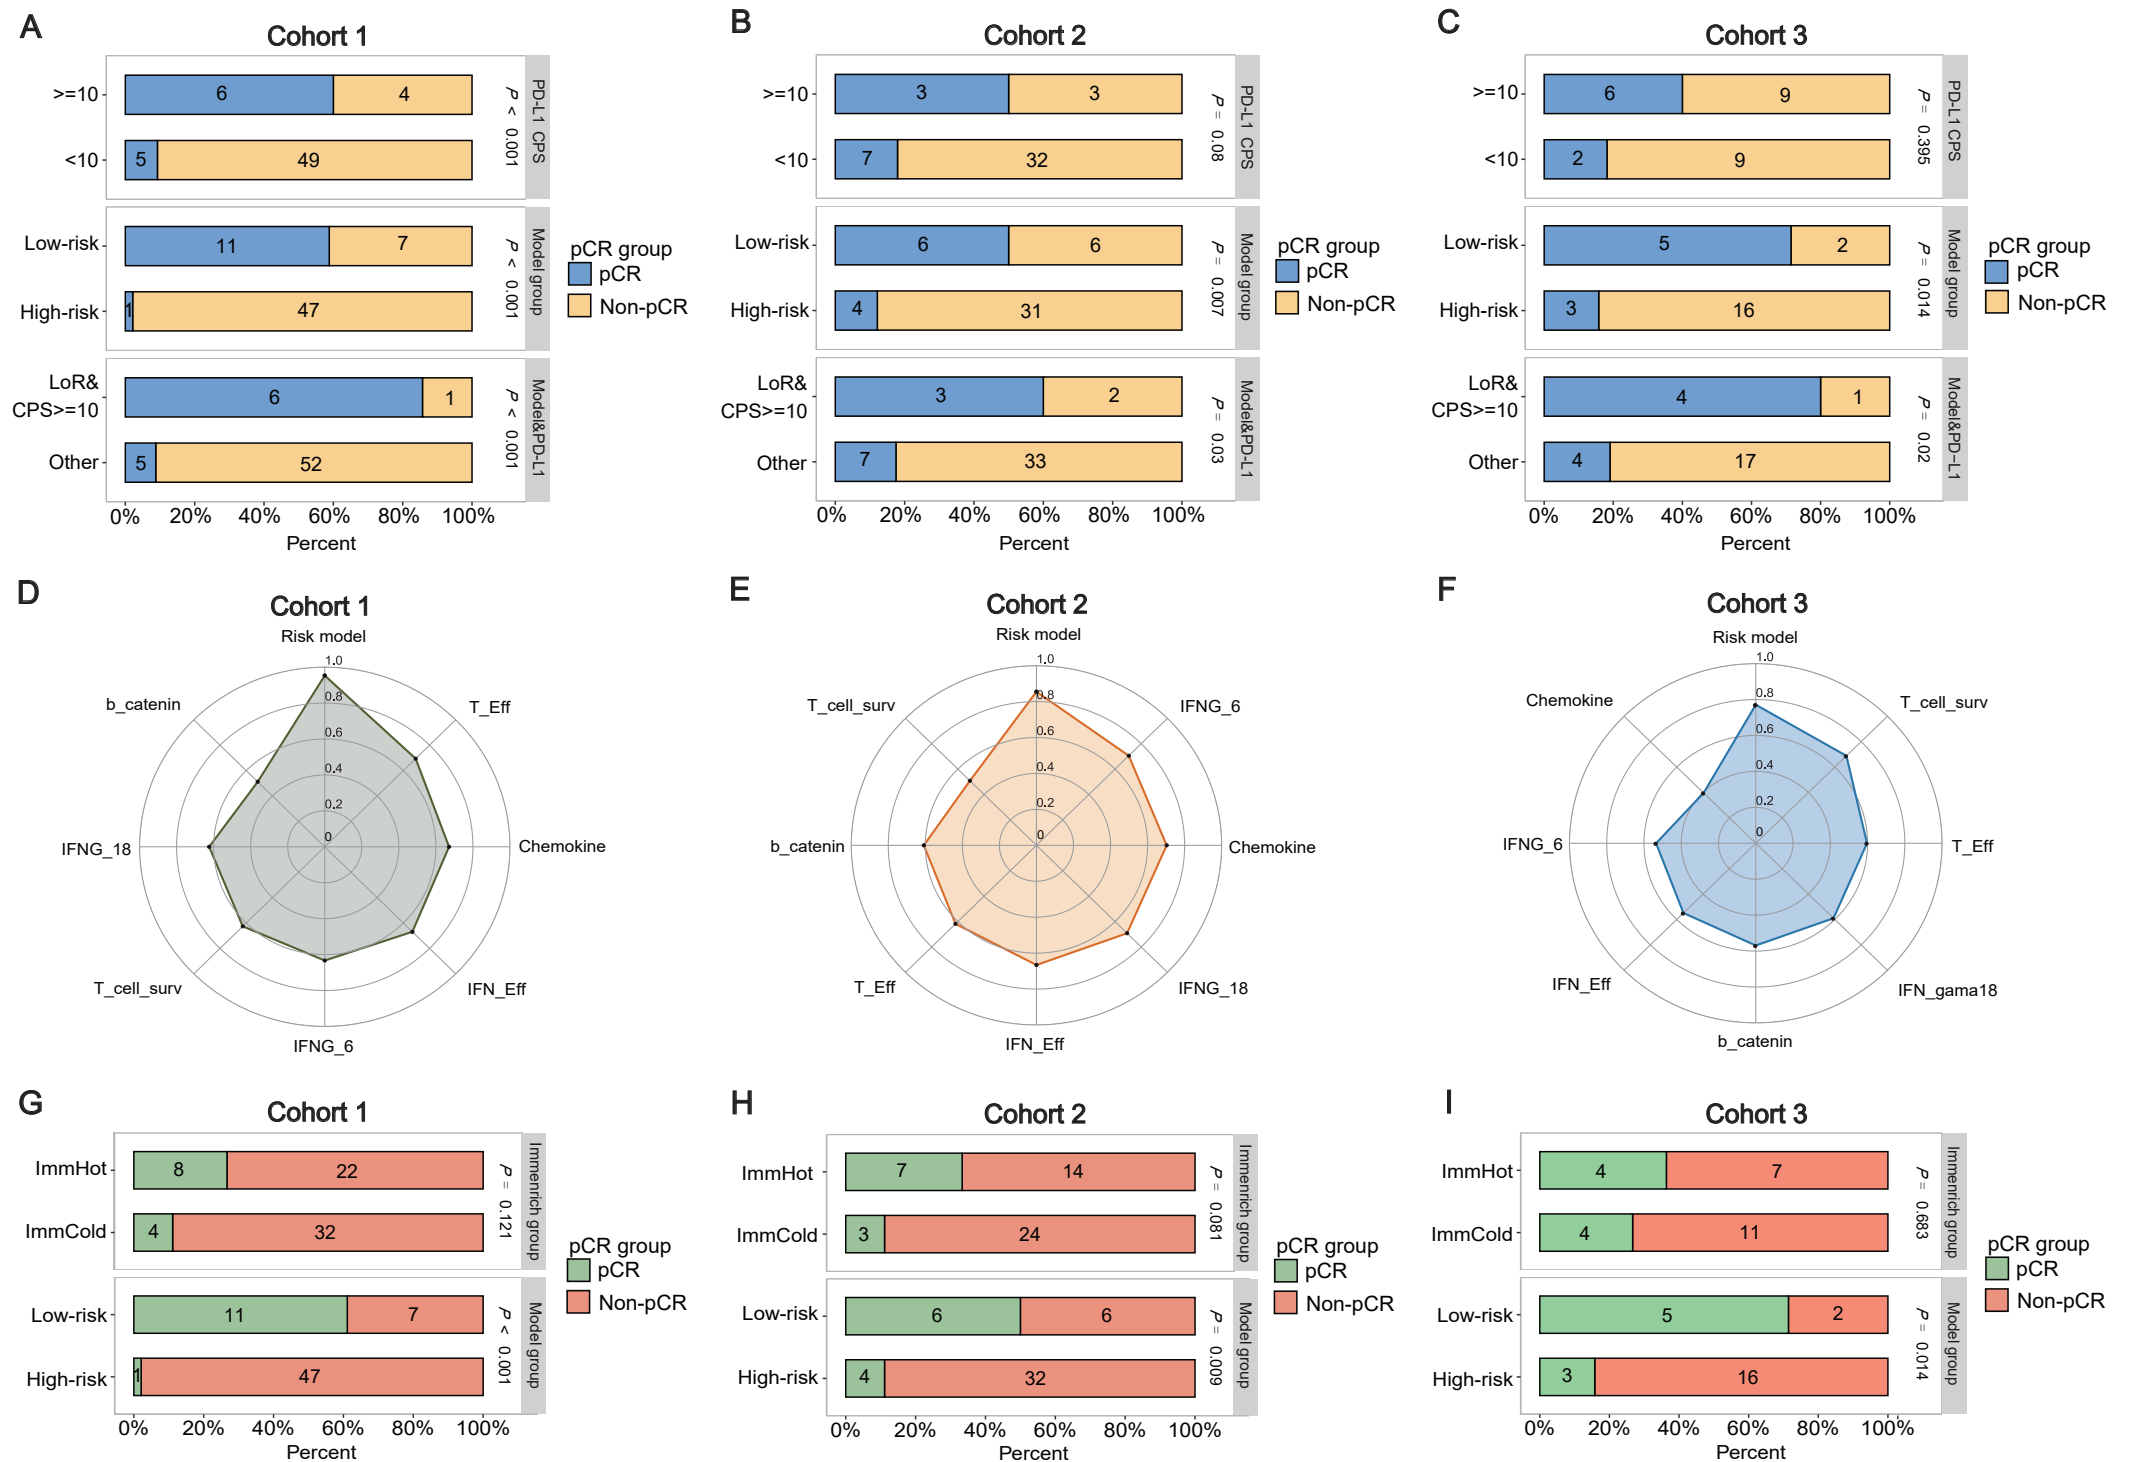

**Figure S5. NCIRPs outperforms conventional GEP biomarkers in predicting therapeutic efficacy of neoadjuvant immunotherapy in ESCC.** Stacked column graphs showing the distribution of non-pCR and pCR patients across various groups based on NCIRPs, PD-L1 expression, and combination of these factors in cohort 1 (A), cohort 2 (B) and cohort 3 (C), respectively. Area under the curve (AUC) values for different gene expression signatures in cohort 1 (D), cohort 2 (E) and cohort 3 (F), respectively. Stacked column graphs illustrating the distribution of non-pCR and pCR patients across immune-enriched and risk prediction groups in cohort 1 (G), cohort 2 (H) and cohort 3 (I), respectively.
