# Supplementary material for: Tumor microenvironment biomarkers predicting pathological response to neoadjuvant chemoimmunotherapy in locally advanced esophageal squamous cell carcinoma: post-hoc analysis of a single center, phase 2 study
Source: PubMed Central journal article supplement — J Immunother Cancer. 2024 Aug 28;12(8):e008942. doi: 10.1136/jitc-2024-008942 (PMC11367339; doi:10.1136/jitc-2024-008942), 2024-08-28
Supplement: jitc-12-8-s007.pdf [file jitc-12-8-s007.pdf]

A

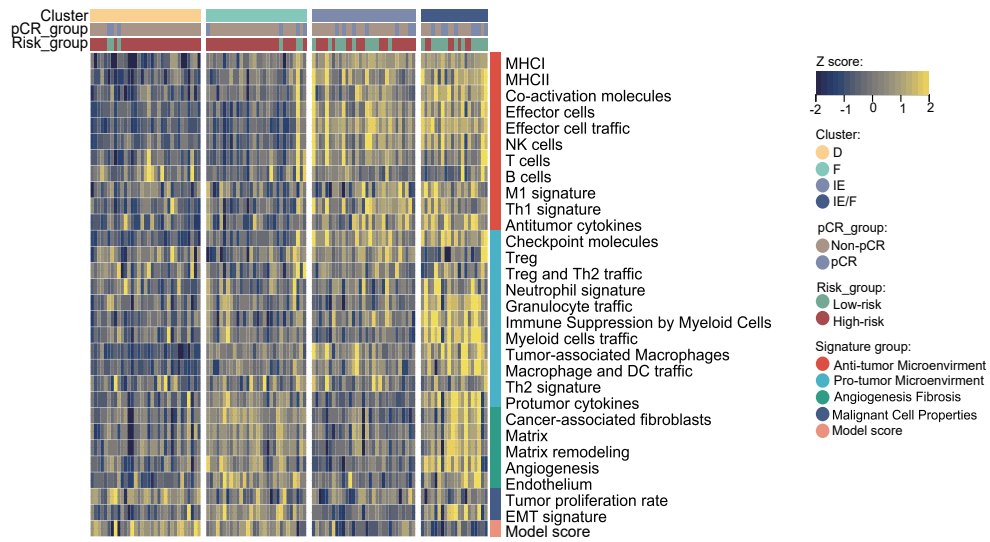

B

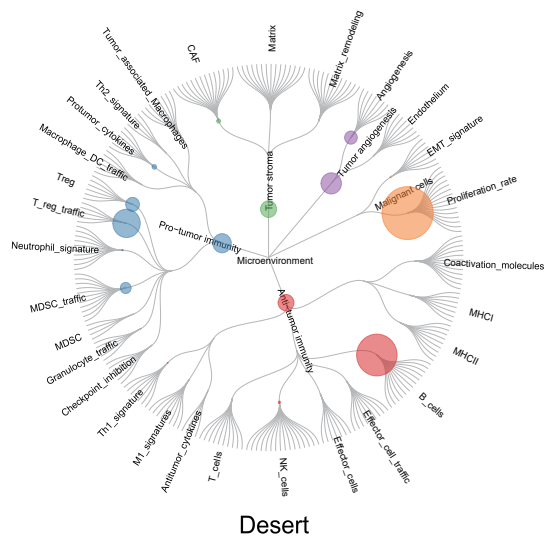

C

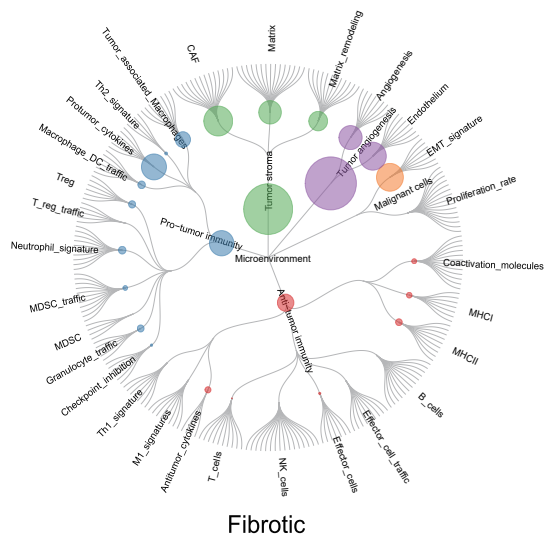

D

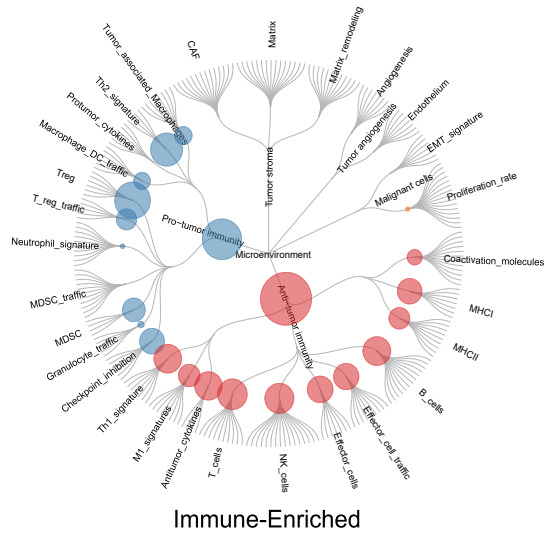

E

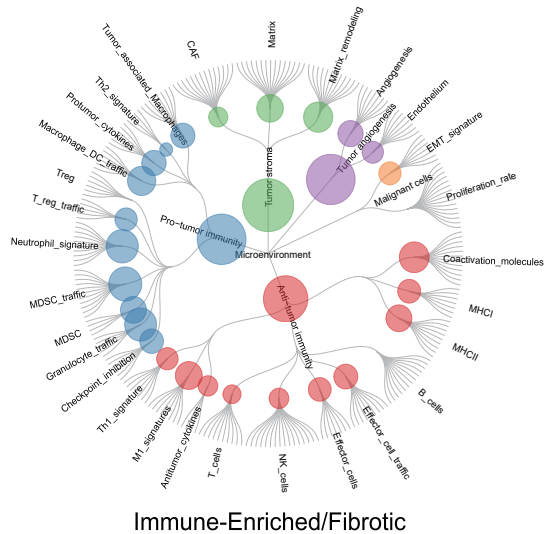

**Figure S6. TME quadricotype results for patients.** (A) Heatmap of 114 samples, including both cohorts 1 and 2, showcasing 29 gene expression signatures related to the TME. Based on the clustering analysis, the samples were categorized into four distinct subtypes: D (Desert), F (Fibrotic), IE (Immune-Enriched), and IE/F (Immune-Enriched/Fibrotic). Petal plots show molecular functional characteristics of the Desert (B), Fibrotic (C), Immune-Enriched (D), and Immune-Enriched/Fibrotic (E) subtypes.
