# Supplementary material for: Tumor microenvironment biomarkers predicting pathological response to neoadjuvant chemoimmunotherapy in locally advanced esophageal squamous cell carcinoma: post-hoc analysis of a single center, phase 2 study
Source: PubMed Central journal article supplement — J Immunother Cancer. 2024 Aug 28;12(8):e008942. doi: 10.1136/jitc-2024-008942 (PMC11367339; doi:10.1136/jitc-2024-008942), 2024-08-28
Supplement: jitc-12-8-s008.pdf [file jitc-12-8-s008.pdf]

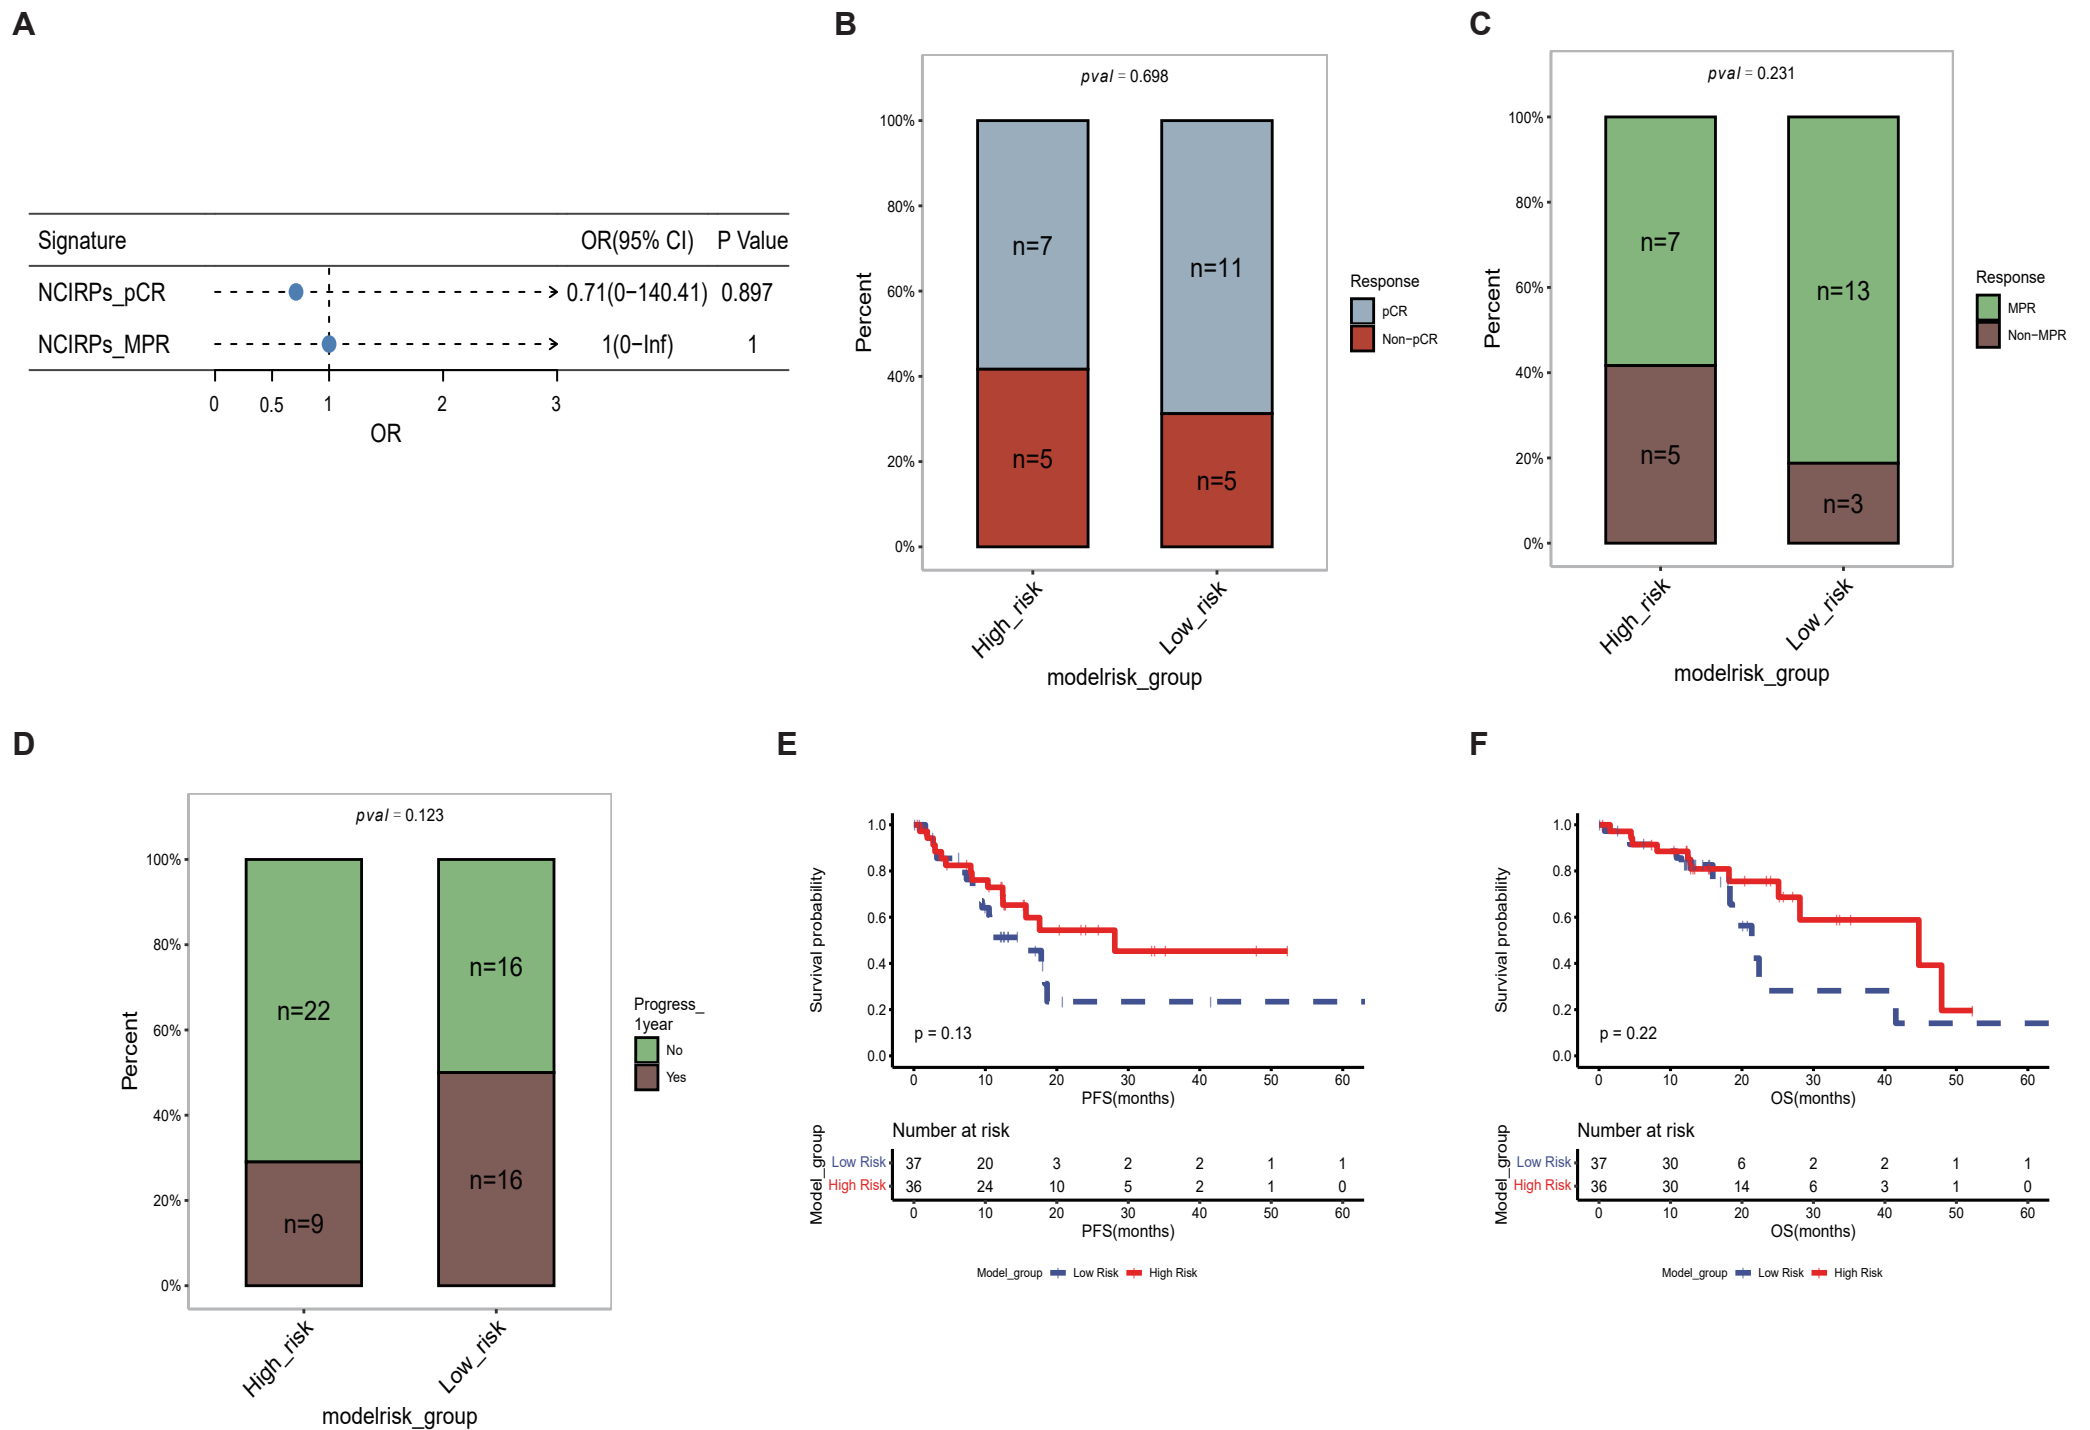

**Figure S7. NCIRPs is an immunotherapy-specific predictive model.** (A) Forest plot for the association between NCIRPs and pCR or MPR in cohort 4. Stacked column graphs illustrating the distribution of different pCR (B) or MPR (C) groups with different risk prediction scores across cohort 4. (D) Stacked column graphs illustrating the distribution of one-year progression patients with different risk prediction scores across TCGA-ESCC cohort. Kaplan–Meier analyses of progression-free survival (PFS) (E) and overall survival (OS) (F) stratified according to the risk prediction score in TCGA-ESCC cohort. Data were analyzed by log-rank test.
